# Supplementary material for: FOXO1 is a master regulator of CAR T memory programming
Source: Research Square preprint supplement (doi:10.21203/rs.3.rs-2802998/v1), 2023-11-07
Supplement: Supplementary file 2 [file a184ebf50d51a6caad5716c2.xlsx]

## Sheet: Geoff
Technique	Fluorophore	Reagent	Clone	Sequence	Source	Identifier
Flow Cytometry	NIR	Zombie NIR Fixable Viability Kit			Biolegend	423105
	eFluor 506	Fixable Viability Kit			eBioscience	65-0866-18
	eFluor 780	Fixable Viability Kit			eBioscience	65-0865-14
	Dylight 650	Anti-14G2a CAR Antibody	1A7		NCI
	Dylight 650	Anti-CD19 CAR Antibody	FMC63		Genscript custom prep
	BUV395	Anti-CD4 Antibody	SK3		BD	563550
	BUV805	Anti-CD8 Antibody	SK1		BD	612889
	BV 605	Anti-CD62L Antibody	DREG-56		Biolegend	304834
	BV650	Anti-CD62L Antibody	DREG-56		BD	562719
	AV488	Anti-CD45RA Antibody	HI100		Biolegend	304114
	BV711	Anti-CD45RA Antibody	HI100		Biolegend	304137
	FITC	Anti-CD45RA Antibody	HI100		BD Bioscience	561882
	PerCP-Cyanine5.5	Anti-CD45 Antibody	HI30		Invitrogen	45-0459-42
	BV421	Anti-IL7Ra Antibody	A019D5		Biolegend	351310
	BV-711	Anti-CD39 Antibody	A1		Biolegend	328228
	APC-Cy7	Anti-CD39 Antibody	A1		Biolegend	328225
	PE-Cy7	Anti-PD1 Antibody	J105		eBiosciences	25-2799-42
	PE	Anti-LAG3 Antibody	3DS223H		eBiosciences	565617
	BV510	Anti-TIM3 Antibody	F38-2E2		Biolegend	345030
	AF488	Anti-FOXO1 Antibody	C29H4		Cell Signaling	58223S
	PE	Anti-TCF1 Antibody	C63D9		Cell Signaling	14456
	AF647	Anti-TCF1 Antibody	C63D9		Cell Signaling	6709S
	BV711	Anti-T-bet Antibody	4B10		Biolegend	644819
	PE	Anti-Bcl-2 Antibody	124		Cell Signaling	26295S
	PE	Anti-TOX Antibody	REA473		Miltenyi Biotech	130-120-785
	Alexa Fluor 488	Anti-LEF1 Antibody	C12A5		Cell Signaling	8490S
	PE-CF594	Anti-Blimp1 Antibody	6D3		BD	565274
	BV-711	Anti-Tbet Antibody	4B10		Biolegend	644820
	BV785	Anti-Tbet Antibody	4B10		Biolegend	644835
		FoxP3 Transcription Factor Staining Buffer Set			eBiosciences	00-5523-00
		CountBright Absolute Counting Beads for Flow Cytometry			Thermo Fisher	C36950
	AF700	Anti-CD8 Antibody	SK1		Biolegend	344723
	PerCP-Cy5.5	Anti-CD62L Antibody	DREG-56		Biolegend	304823
	Dylight 650	DyLight 650 Labeling Kit			Thermo Scientific	84535
		UltraComp eBeads™ Plus Compensation Beads			Thermo Scientific	01-3333-42
ELISA		ELISA MAX™ Deluxe Set Human IL-2			Biolegend	431816
		ELISA MAX™ Deluxe Set Human IFN-γ			Biolegend	430116
Cell Culture		Human Peripheral Blood Leukopak, Fresh			StemCell Technologies	70500
		Dynabeads™ Human T-Activator CD3/CD28			Gibco	11131D
		RetroNectin Recombinant Human Fibronectin Fragment			Takara Bio	T100B
		DMEM, high glucose, pyruvate, no glutamine			Gibco	10313039
		RPMI 1640 Medium, No Glutamine			Gibco	21870092
		AIM V™ Medium			Gibco	12055091
		Opti-MEM			Gibco	31985070
		CryoStor CS10			StemCell Technologies	7930
		Recombinant Human IL-2			PeproTech	200-02
		Fetal Bovine Serum (Heat Inactivated)			Sigma	12306C
		Dialyzed Fetal Bovine Serum			Gibco	26400044
		Penicillin Steptomycin			Gibco	15140-122
		Penicillin-Streptomycin-Glutamine			Gibco	10378016
		HEPES Buffer, pH 7.4			Penn Cell Center
		GlutaMAX (100X)			Gibco	35050-061
		Foxo1 Inhibitor, AS1842856			Calbiochem	344355
CRISPR		CRISPRevolution sgRNA EZ Kit - AAVS1 - modified		GGGGCCACUAGGGACAGGAU	Synthego
		CRISPRevolution sgRNA EZ Kit - FOXO1_G1 - modified		UUGCGCGGCUGCCCCGCGAG	Synthego
		CRISPRevolution sgRNA EZ Kit - FOXO1_G4 - modified		GAGCUUGCUGGAGGAGAGCG	Synthego
		CRISPRevolution sgRNA EZ Kit - TCF1 KO AD - modified		uuuuccaggccugaaggccc	Synthego
		Alt-R S.p. Cas9 Nuclease			Integrated DNA Technologies	1081058
		P3 Primary Cell 4D-Nucleofector™ X Kit S			Lonza	V4XP-3032
		Nuclease Free Duplex Buffer			Integrated DNA Technologies	11-01-03-01
Selection		EasySep Human CD271 Positive Selection Kit II			StemCell Technologies	17849
		EasySep Human CD8+ T Cell Enrichment Kit			StemCell Technologies	19053
		EasySep Release Human CD45 Positive Selection Kit			StemCell Technologies	Cat# 100-0107
	PE	Anti-CD62L Antibody	DREG-56		BD	555544
		Biotin anti-human CD271 (NGFR) Antibody			BioLegend	345122
		Streptavidin Microbeads			Miltenyi Biotech	130-048-101
		LS Columns			Miltenyi Biotech	130-042-401
		EasySep PE Positive Selection Kit II			StemCell Technologies	17684
Cloning		Phusion Hot Start Flex 2x Master Mix			New England Biolabs	M0536L
		NEBuilder HiFi DNA Assembly Master Mix			New England Biolabs	E2621L
		BspEI			New England Biolabs	R0540S
		SalI			New England Biolabs	R0138S
Western blot		Rabbit Anti-FOXO1	C29H4		Cell Signaling	2880
		Lamin A Mouse mAb	133A2		Cell Signaling	86846
		GAPDH Mouse mAb	D4C6R		Cell Signaling	97166
		Anti-rabbit IgG, HRP-linked Antibody			Cell Signaling	7074
		Anti-mouse IgG, HRP-linked Antibody			Cell Signaling	7076
ATAC-Seq		Illumina Tagment DNA Enzyme and Buffer Small Kit			Illumina	20034197
		BAMBANKER			Wako Chemicals	302-14681
RNA-Seq		RNeasy Plus Mini Kit			Qiagen	74134
		AllPrep DNA/RNA Micro Kit			Qiagen	80284
Seahorse		Seahorse XF RPMI			Agilent Technologies	103576-100
		Seahorse XF Cell Mito Stress Test Kit			Agilent Technologies	103015-100
		Corning Cell-Tak Cell and Tissue Adhesive			Corning	CB-40240
		Seahorse XFe96 FluxPaks			Agilent Technologies	102601-100
In vivo		D-Luciferin Firefly, Potassium Salt			Biosynth	L-8220
